CORRECTION

## Correction: Turning the tide on turnover: The impact of empowering leadership on the work-family spillover of managers

Naseer Abbas Khan, Waseem Bahadur, Robin Maialeh, Natayla Pravdina, Maria Akhtar

There are errors in [Fig 1](#). Please see the correct [Fig 1](#) here.

### Reference

1. Khan NA, Bahadur W, Maialeh R, Pravdina N, Akhtar M. Turning the tide on turnover: The impact of empowering leadership on the work-family spillover of managers. PLoS One. 2023;18(8):e0287674. <https://doi.org/10.1371/journal.pone.0287674> PMID: [37561798](https://pubmed.ncbi.nlm.nih.gov/37561798/)

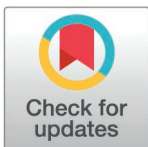

### OPEN ACCESS

**Citation:** Khan NA, Bahadur W, Maialeh R, Pravdina N, Akhtar M (2026) Correction: Turning the tide on turnover: The impact of empowering leadership on the work-family spillover of managers. PLoS One 21(4): e0347579. <https://doi.org/10.1371/journal.pone.0347579>

**Published:** April 16, 2026

**Copyright:** © 2026 Khan et al. This is an open access article distributed under the terms of the [Creative Commons Attribution License](#), which permits unrestricted use, distribution, and reproduction in any medium, provided the original author and source are credited.

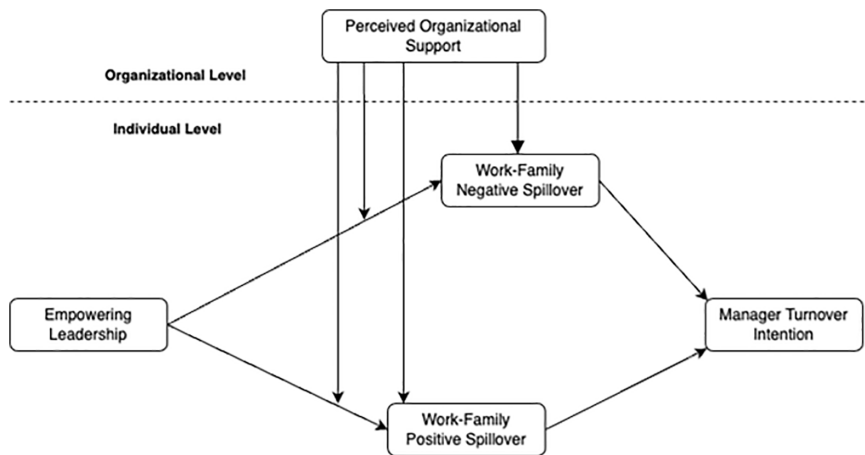

Fig 1. Research model.

<https://doi.org/10.1371/journal.pone.0347579.g001>
